# Supplementary material
Source: publisher figshare collection journal article supplement (https://sage.figshare.com/ndownloader/files/20420547)
Supplement: Supplementary file 1 [file 20420547]

**Supplementary Table 1.** Potentially Problematic Behaviors That Might Indicate That the Respondent Has a Comprehension Problem or Other Problem with the Task

| Behavior                                   | Description                                                                                                      | Examples <sup>a</sup>                                                                                                                                                                                                                                                                                                                                                                           |
|--------------------------------------------|------------------------------------------------------------------------------------------------------------------|-------------------------------------------------------------------------------------------------------------------------------------------------------------------------------------------------------------------------------------------------------------------------------------------------------------------------------------------------------------------------------------------------|
| Explicit request for clarification         | Respondent asks for clarification of the question or response categories or both                                 | "Those last two [responses] means it is not good right?"                                                                                                                                                                                                                                                                                                                                        |
| Explicit request for repeating of question | Respondent asks to repeat the question either by replaying the pre-recording or re-reading the question verbatim | "Can you play it again for me to listen?"                                                                                                                                                                                                                                                                                                                                                       |
| Pauses                                     | Respondent pauses or hesitates for 2 seconds or longer                                                           | [Pause]                                                                                                                                                                                                                                                                                                                                                                                         |
| Fillers                                    | Respondent uses fillers                                                                                          | "uhm", "huh", "uhuh"                                                                                                                                                                                                                                                                                                                                                                            |
| Report                                     | Respondent provides a substantive answer that does not match the response format projected by the question       | <p><u>Question:</u> Does your health now limit you in moderate activities such as moving table, pushing a vacuum cleaner, or bowling? If so how much? Yes, limited a lot select black, yes limited a little select red, or no, not limited at all select yellow.</p> <p><u>Respondent answered:</u> "Right now I cannot carry more than 10 pounds because if I do then my leg hurts a lot."</p> |
| Expresses task uncertainty                 | Respondent knows true state, but is not sure how to communicate it using the standardized response categories    | "My health is not good but I am not sure which color."                                                                                                                                                                                                                                                                                                                                          |
| Expresses state uncertainty                | Respondent is uncertain of his or her "true" state                                                               | <p><u>Question:</u> In general, would you say your health is: excellent select yellow, very good select green, good select blue, fair select red, or poor select black?</p> <p><u>Respondent answered:</u> "I am no longer like when [I] am younger. I am sick."</p>                                                                                                                            |

|                             |                                                                                                                        |                                                                                                              |
|-----------------------------|------------------------------------------------------------------------------------------------------------------------|--------------------------------------------------------------------------------------------------------------|
| Expresses other uncertainty | Respondent's ambiguous statement does not indicate clearly whether she or he has task uncertainty or state uncertainty | "I don't know" or "I don't really have any feelings about that", "that doesn't apply to me", or "it depends" |
|-----------------------------|------------------------------------------------------------------------------------------------------------------------|--------------------------------------------------------------------------------------------------------------|

---

<sup>a</sup>The examples are taken from the interviews

**Supplementary Table 2.** Social Characteristics of Hmong Older Adult Respondents and Family Helpers

|                                             | Respondent (N=30) |         | Helper (N=30) |         |
|---------------------------------------------|-------------------|---------|---------------|---------|
|                                             | N                 | Percent | N             | Percent |
| Sex                                         |                   |         |               |         |
| Female                                      | 22                | 73      | 27            | 90      |
| Male                                        | 8                 | 27      | 3             | 10      |
| Age range (mean)                            | 47-85 (66.5)      |         | 18-54 (29.2)  |         |
| Range of Number of Years Lived in US (mean) | 9-36 (22.9)       |         | 10-30 (19.1)  |         |
| How well do you read Hmong?                 |                   |         |               |         |
| Not at all                                  | 21                | 70      | 8             | 27      |
| Not well                                    | 2                 | 7       | 7             | 23      |
| Well                                        | 4                 | 13      | 13            | 43      |
| Very well                                   | 3                 | 10      | 2             | 7       |
| How well do you write Hmong?                |                   |         |               |         |
| Not at all                                  | 23                | 77      | 8             | 27      |
| Not well                                    | 3                 | 10      | 9             | 30      |
| Well                                        | 3                 | 10      | 11            | 37      |
| Very well                                   | 1                 | 3       | 2             | 7       |
| How well do you read English?               |                   |         |               |         |
| Not at all                                  | 26                | 87      | 0             | 0       |
| Not well                                    | 3                 | 10      | 9             | 30      |
| Well                                        | 1                 | 3       | 8             | 26      |
| Very well                                   | 0                 | 0       | 13            | 43      |
| How well do you write English?              |                   |         |               |         |
| Not at all                                  | 25                | 83      | 1             | 3       |
| Not well                                    | 4                 | 13      | 9             | 30      |
| Well                                        | 1                 | 3       | 8             | 26      |

|           |   |   |    |    |
|-----------|---|---|----|----|
|           |   |   |    | 4  |
| Very well | 0 | 0 | 12 | 40 |

---

The image shows a sample laptop screen for the ACASI-H system. It features three numbered items in circles: 1a, 2, and 2a. Item 1a is a play button icon next to a progress bar. Item 2 is a question: "During the past 4 weeks, how many times have you felt calm and peaceful?". Item 2a is a horizontal bar with six colored segments: black, pink, red, blue, green, and yellow. Below this bar are six radio button options: "None of the time", "A little of the time", "Some of the time", "A good bit of the time", "Most of the time", and "All of the time". Below these options is a question for the helper: "For Helper: Did you use the audio recording?". There are two radio button options: "Yes" and "No". At the bottom center is a "Survey Completion" progress bar showing 0% to 100%. At the bottom left is a "Back" button and at the bottom right is a "Next" button.

**Supplementary Figure 1.** Sample Laptop Screen for Audio Computer Assisted Self-interviewing with Color-Coding and Helper Assistance (ACASI-H)\*

\*Note: The 1a, 2, and 2a are added to correspond to the notes. The screen shows: (1a) a bar to play a pre-recorded oral Hmong translation for the respondent; (2) is the original question in English for the helper; and (2a) shows the response categories with both verbal and colored labels. The recorded voice says in Hmong: “During the past 4 weeks, how many times have you felt calm and peaceful; none of the time select black, a little of the time select pink, some of the time select red, a good bit of the time select blue, most of the time select green, or all of the time select yellow.”

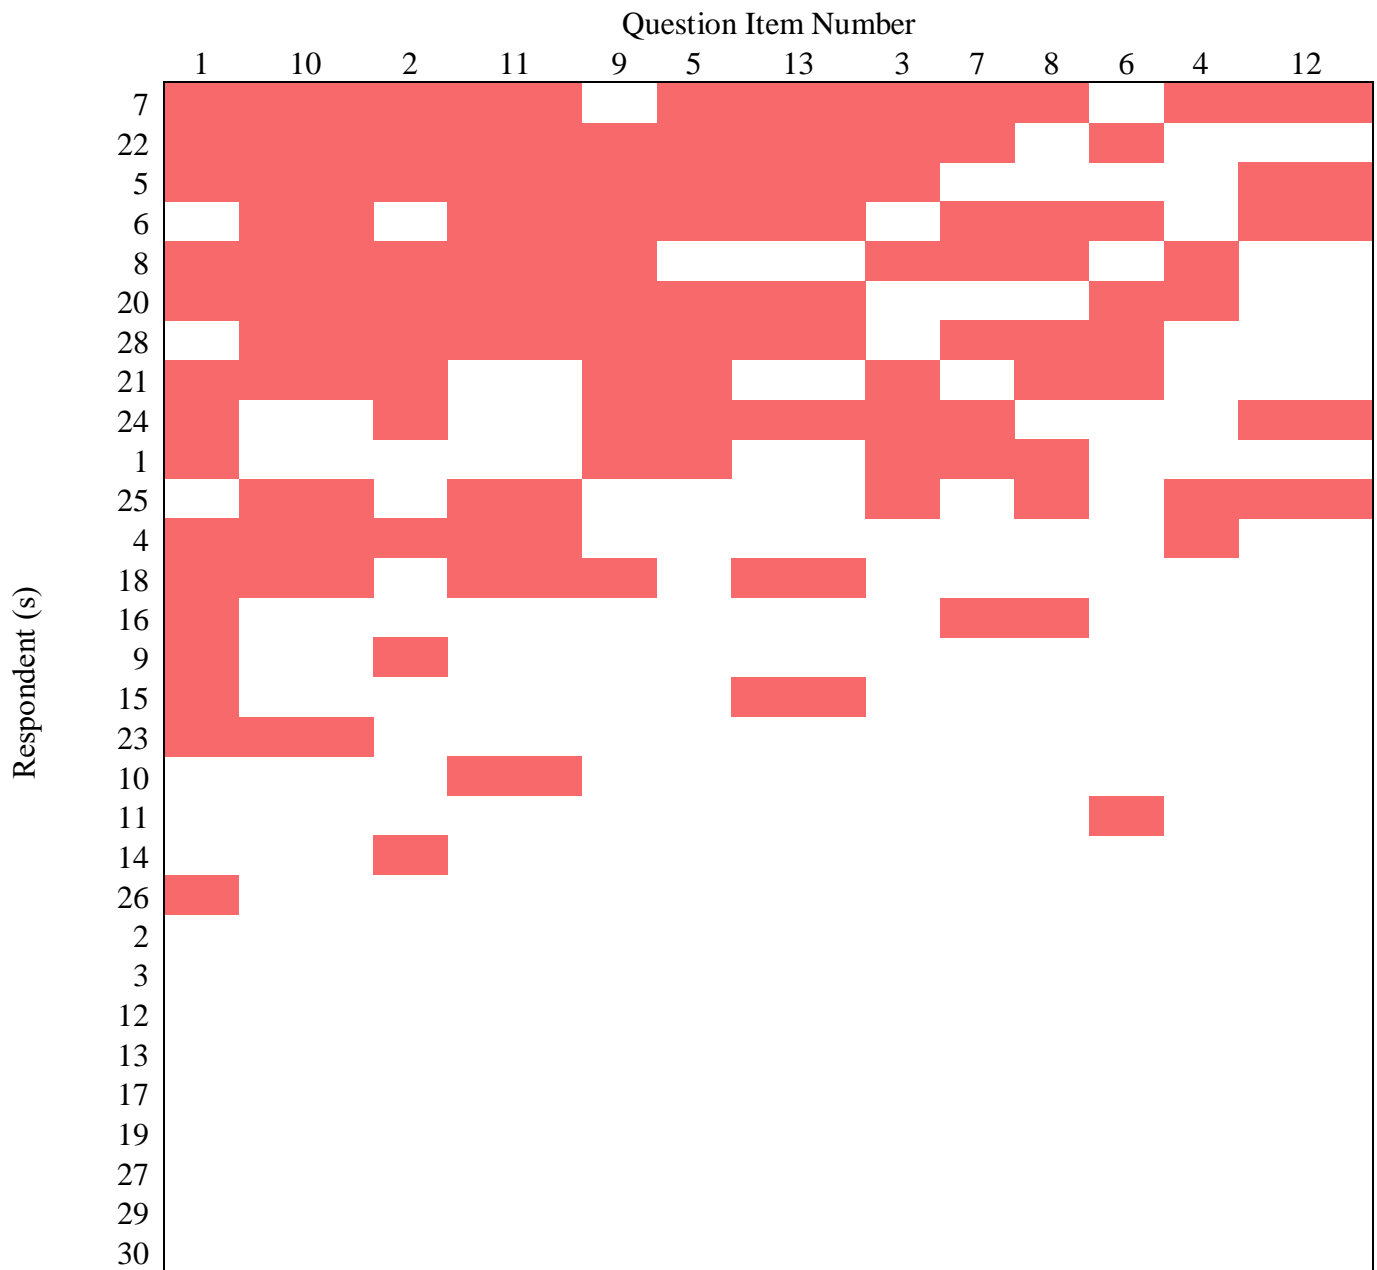

**Supplementary Figure 2.** Heat Map of Occurrence of At Least One Uncodable Answer by Respondent and Question, Questions and Respondents Sorted by the Frequency of Uncodable Answers

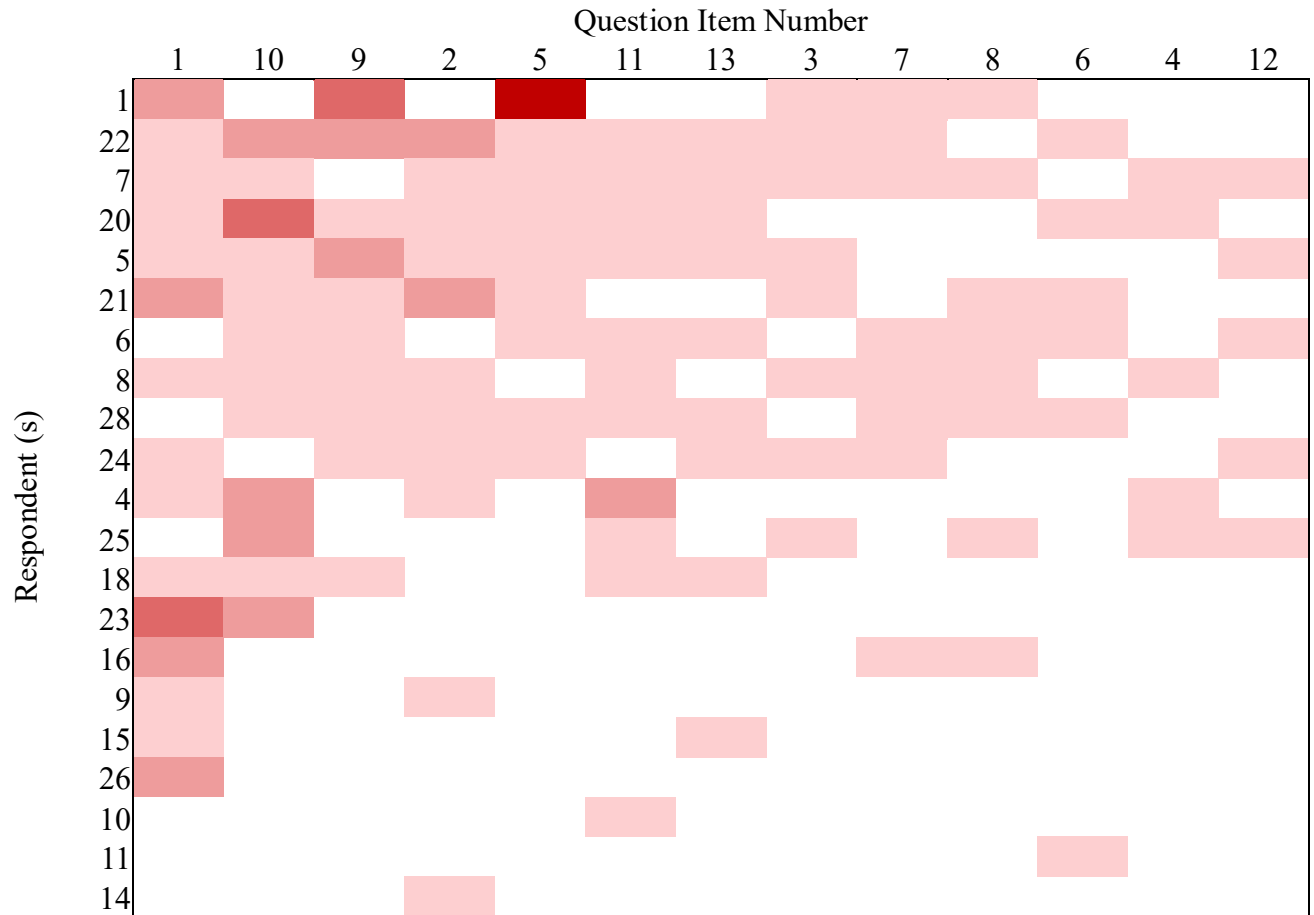

**Legend:** Number of Times Respondent Gave a Uncodable Answer for Each Question, for Respondents Whose First Answer Was Not Codable

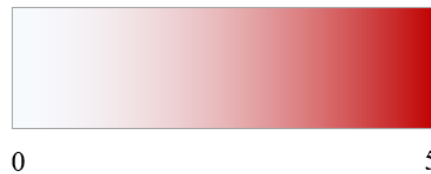

**Supplemental Figure 3.** Heat Map of Number of Times Respondent Gave a Uncodable Answer for Each Question, Questions and Respondents Sorted by the Frequency of Uncodable Answers, for Respondents Whose First Answer Was Not Codable

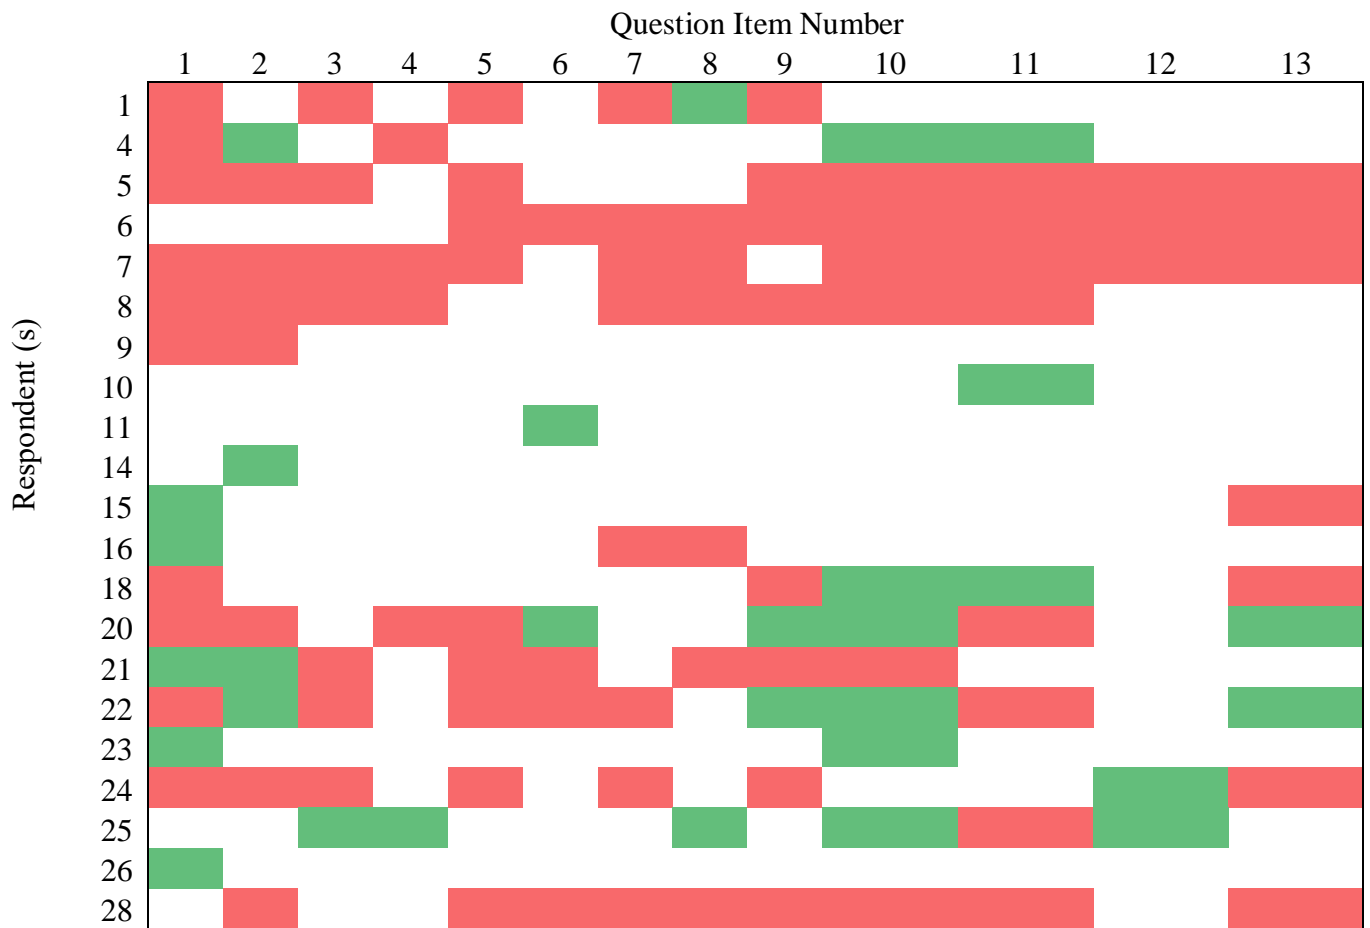

**Supplemental Figure 4.** Heat Map Showing Whether or Not the Respondent Herself or Himself Provided a Final Codable Answer, Questions in Order Asked and Respondents in Order Interviewed, for Respondents Whose First Answer Was Not Codable
